# Supplementary material for: New Synthesized Activating Transcription Factor 3 Inducer SW20.1 Suppresses Resistin-Induced Metabolic Syndrome
Source: MDPI journal article supplement (doi:10.3390/biomedicines11061509), 2023-05-23
Supplement: s1 [file s1]

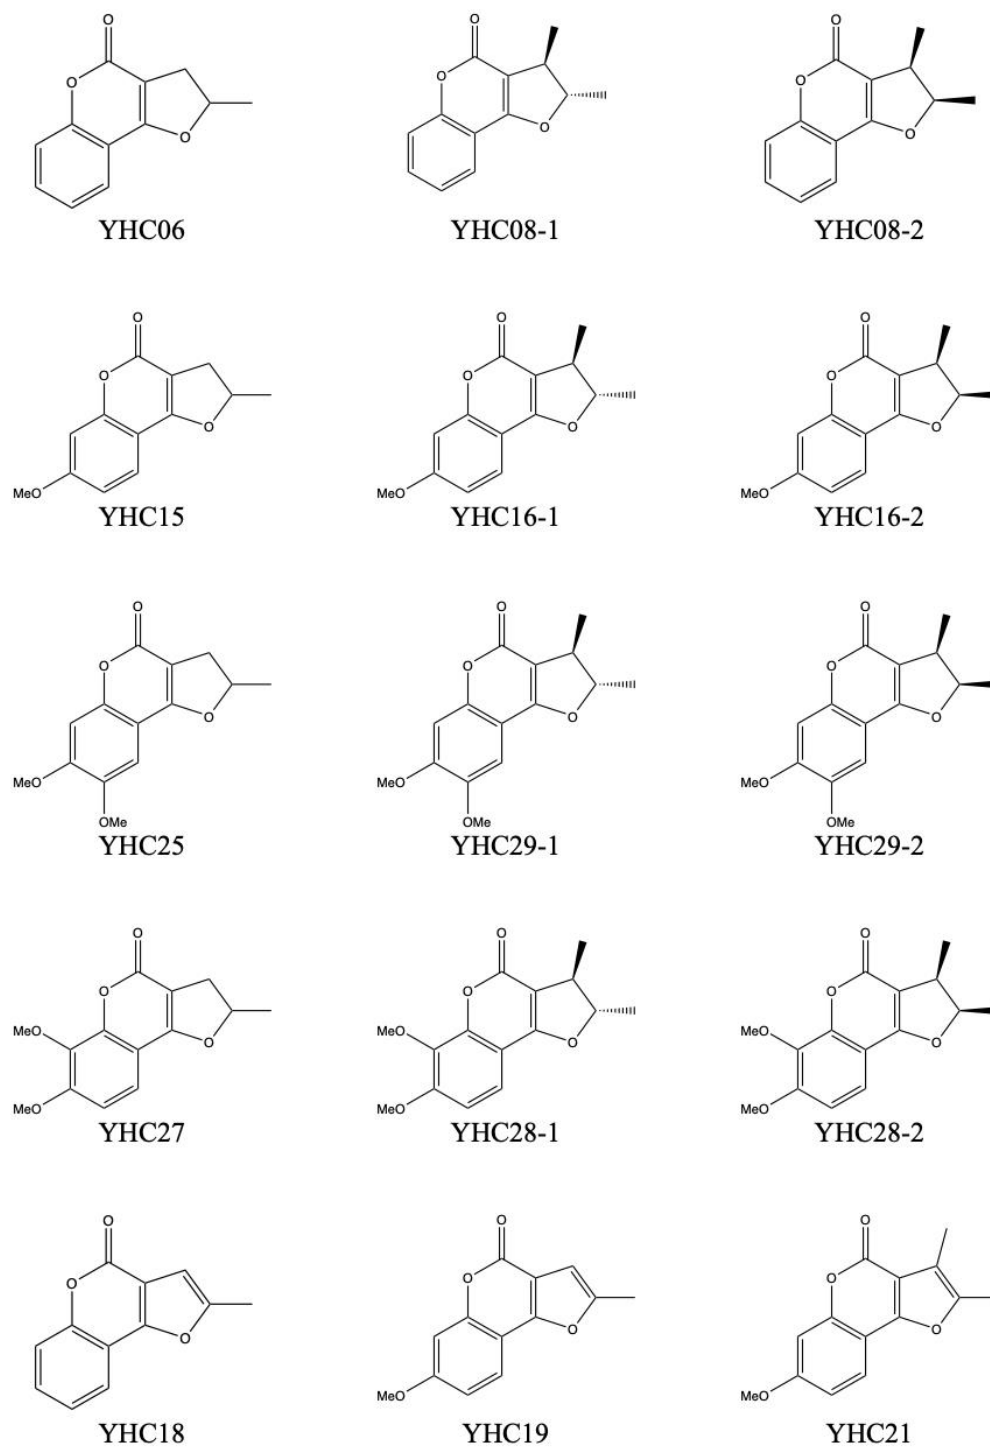

**Figure S1:** The chemical structure of ATF3- inducer compounds

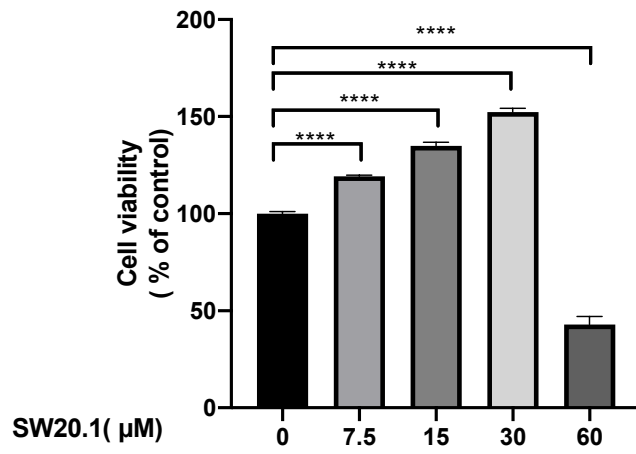

(a)

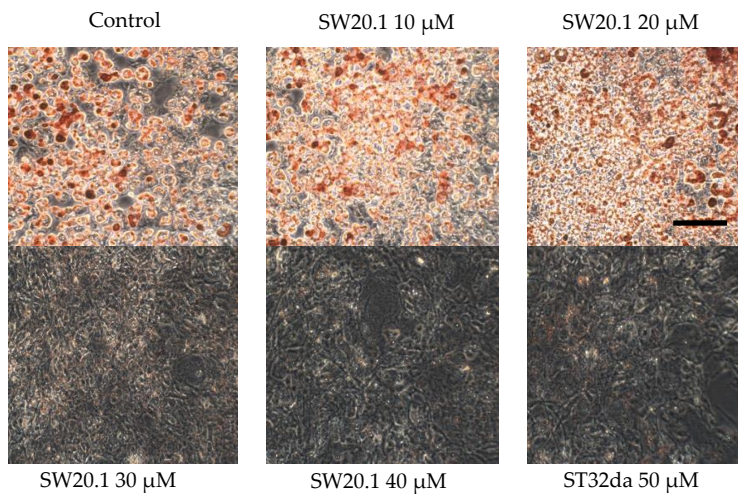

Scale bar = 200x

(b)

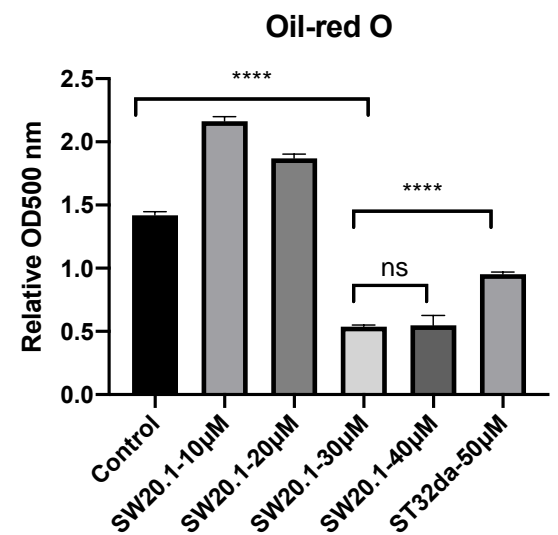

(c)

**Figure S2.** Effects of SW20.1 on cell viability in 3T3-L1 cell line and inhibited lipid accumulation of 3T3-L1 preadipocyte. (a) Cell viability was measured after treatment with various concentrations of SW20.1 (b) Oil red O staining of differentiated 3T3-L1 adipocytes treated with Vehicle, SW20.1, and ST32da for 8 days. (c) Relative qualification of the lipid content. Statistical comparisons were performed using unpaired t-test (a, c). Data are presented as mean  $\pm$  standard error; \*\*\*\*  $p < 0.0001$ .

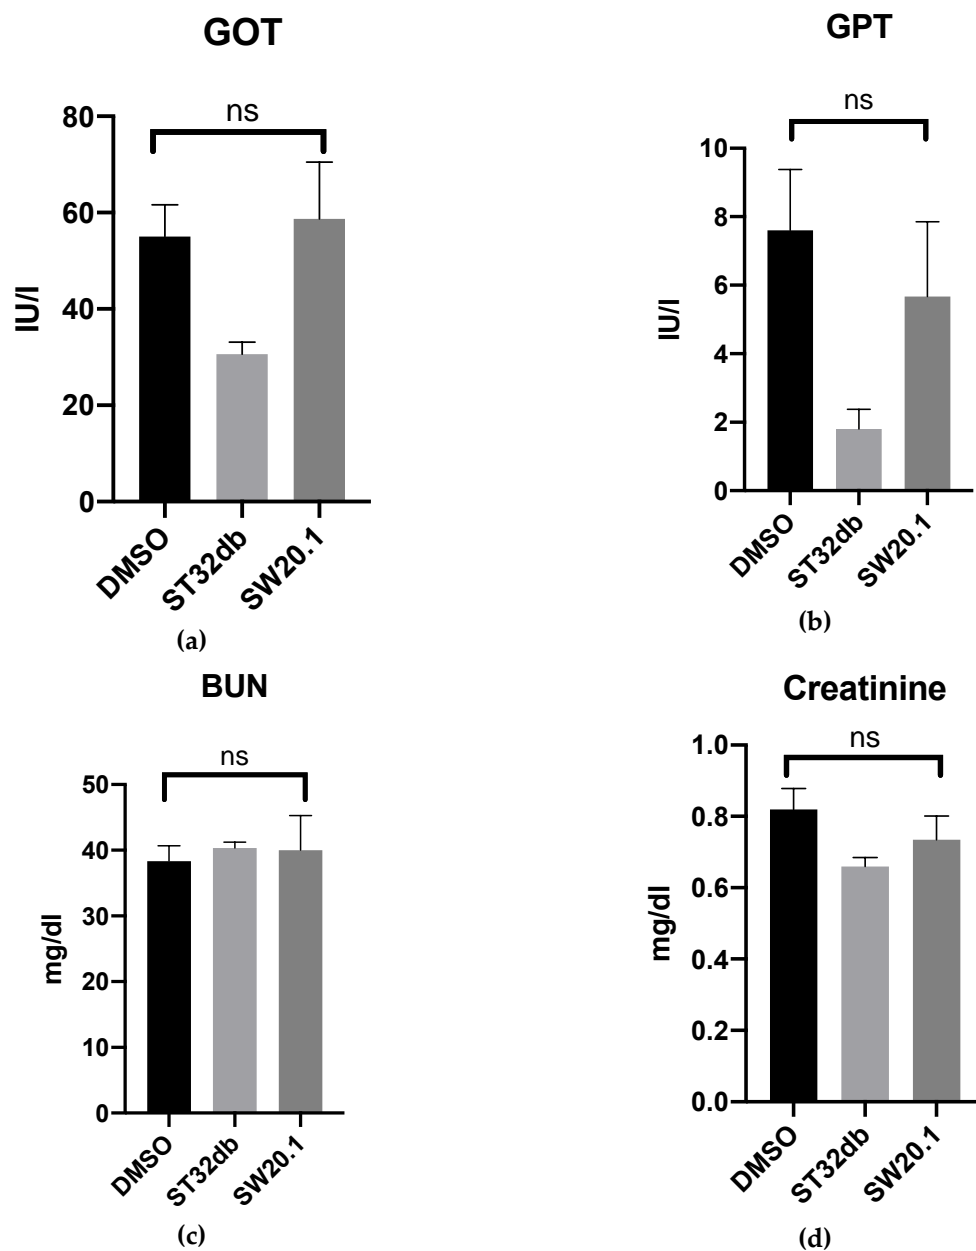

**Figure S3:** Biochemical parameters. (a) aspartate aminotransferase (GOT), (b) alanine aminotransferase (GPT), (c) Creatinin, (d) Blood Urea Nitrogen (BUN). Statistical comparisons were performed using unpaired t-test (a,b,c,d). Data are presented as mean  $\pm$  standard error, ns non-significant.
